# Supplementary material
Source: Springer Nature journal article supplement (https://www.springermedizin.de/resource/supplementary/12936_2011_1810_MOESM4_ESM.pdf/9541780)

**KEY***Anopheles arabiensis* with  
alternative hosts*Anopheles gambiae* with  
no alternative hostsNo toxicity ( $\theta_{\mu}=0$ ):

- - - - -

- - - - -

Partial, pre-feed toxicity ( $\theta_{\mu,pre}=0.5$ ,  $\theta_{\mu,post}=0$ ):

—————

—————

**RELATIVE CHANGE IN UNDERLYING POPULATION PARAMETER**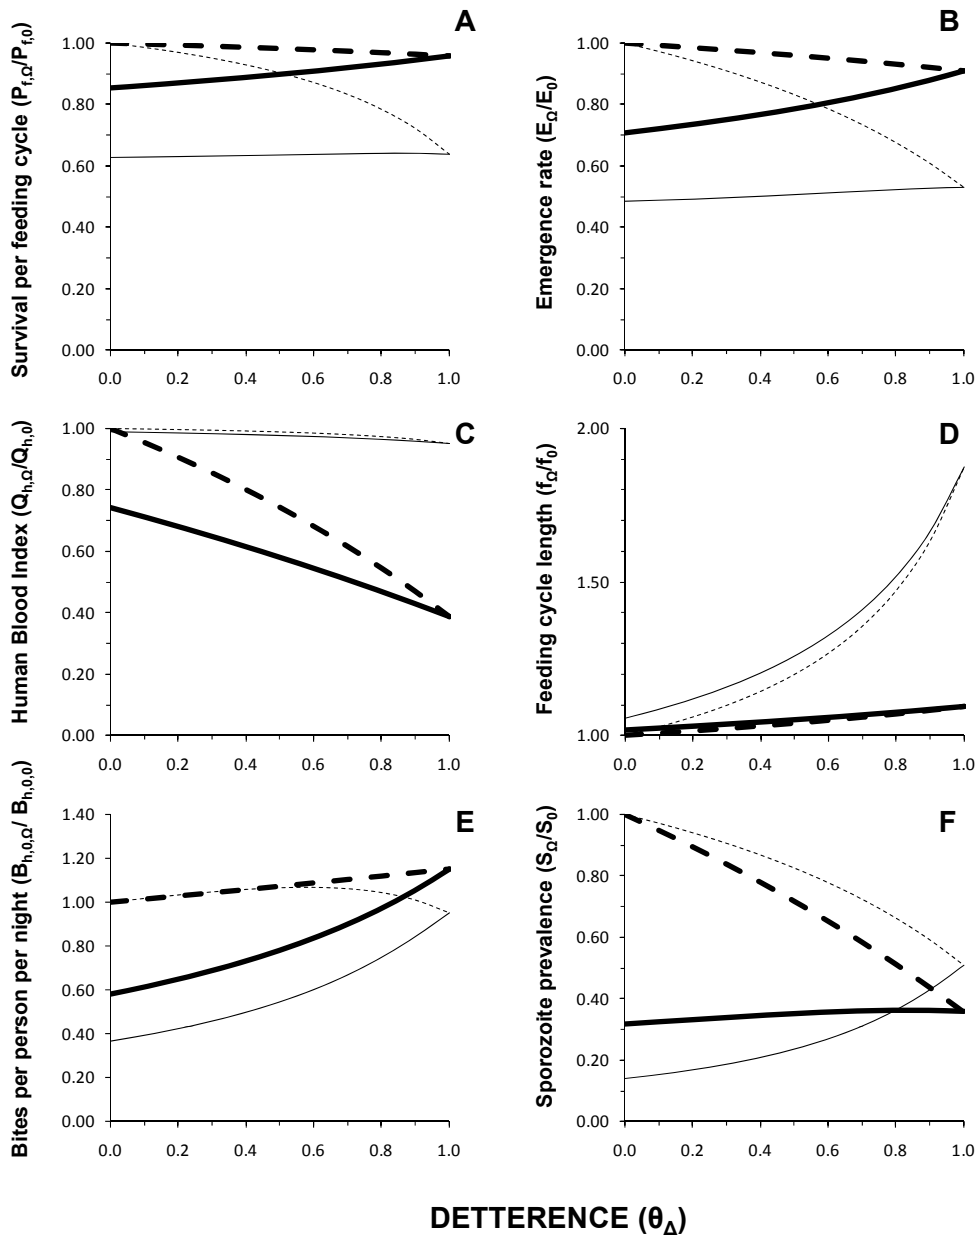

Supplement: MOESM4 [file 9541780]
